# Supplementary material for: Elevated electrochemical performances enabled by a core–shell titanium hydride coated separator in lithium–sulphur batteries
Source: Royal Society of Chemistry journal article supplement (doi:10.1039/d1ra04281e), 2021-01-01
Supplement: d1ra04281e1.pdf [file d1ra04281e1.pdf]

## **Electronic Supplementary Material (ESI) for RSC advances**

**Elevated Electrochemical Performances Enabled by Core-Shell**

**Titanium Hydride Coated Separator in Lithium Sulphur Batteries**

Zhiyuan Zhao,<sup>a</sup> Xiaobo Duan,<sup>\*a</sup> Lei Zhang,<sup>a</sup> Zhiwei Che,<sup>a</sup> Kun Wang,<sup>a</sup> Bin zheng,<sup>\*a</sup>  
Xiaogang Wang<sup>a</sup>

<sup>a</sup>Department of Materials Science & Engineering, Xi'an University of Science and  
Technology, Xi'an710054, china.

E-mail: [xiaobo12558@163.com](mailto:xiaobo12558@163.com), [zhengbin@xust.edu.cn](mailto:zhengbin@xust.edu.cn)

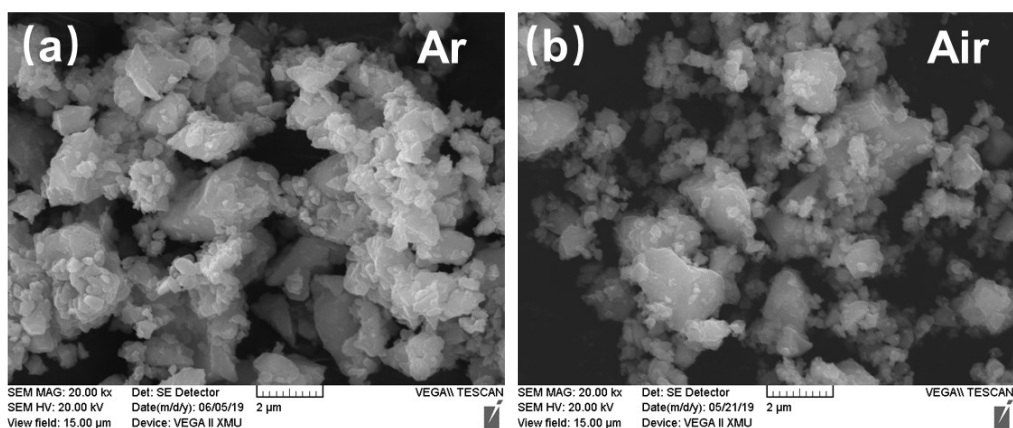

Figure S1 SEM images of the TiH<sub>2</sub> powder ball milled in Ar (a) and air (b)

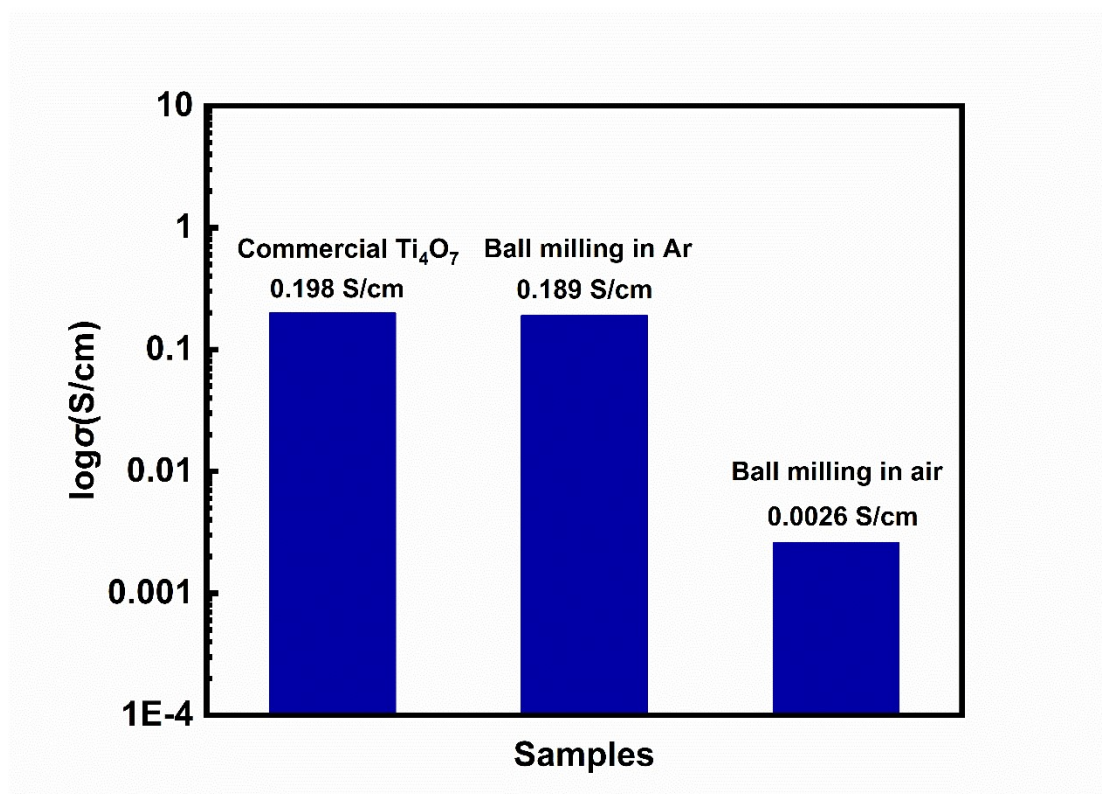

Figure S2 Electronic conductivities of the Ti<sub>4</sub>O<sub>7</sub> powder ball milled in Ar or air

Table S1 Chemical composition of the TiH<sub>2</sub> samples and nano TiO<sub>2</sub> powder by XPS

| element | Commercial TiH <sub>2</sub> (at%) | TiH <sub>2</sub> ballled in Ar (at%) | Nano TiO <sub>2</sub> (at%) |
|---------|-----------------------------------|--------------------------------------|-----------------------------|
| C 1s    | 42.65                             | 23.73                                | 16.74                       |
| Ti 2p   | 17.05                             | 20.4                                 | 25.41                       |
| S 2p    | 0.37                              | 0.38                                 | 0.31                        |
| O 1s    | 39.93                             | 55.49                                | 57.54                       |

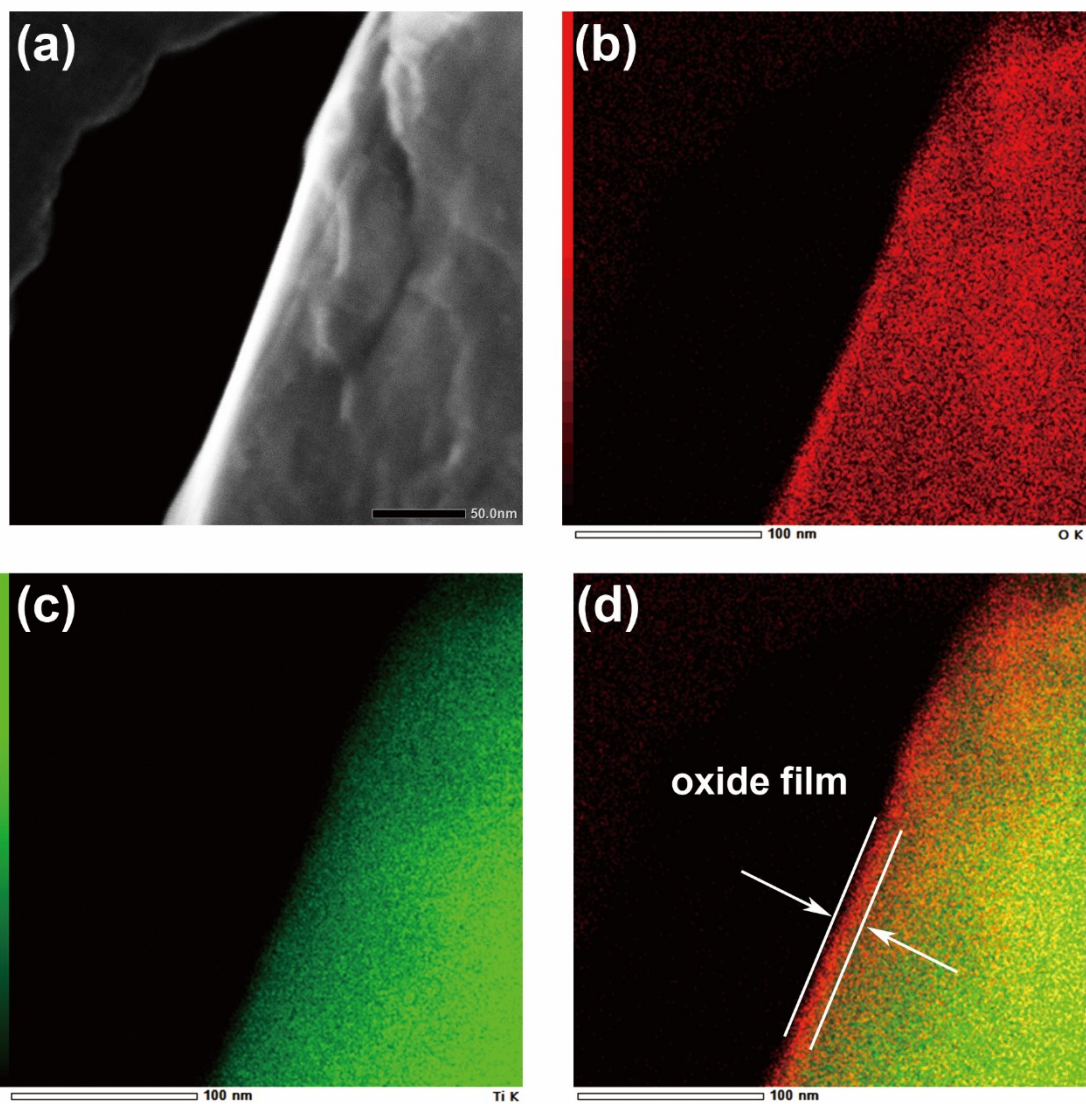

Figure S3 Element mappings of the edge of the  $\text{TiH}_2$  powder. (a) TEM image, (b) O. (c) Ti, (d) O and Ti overlapped mapping



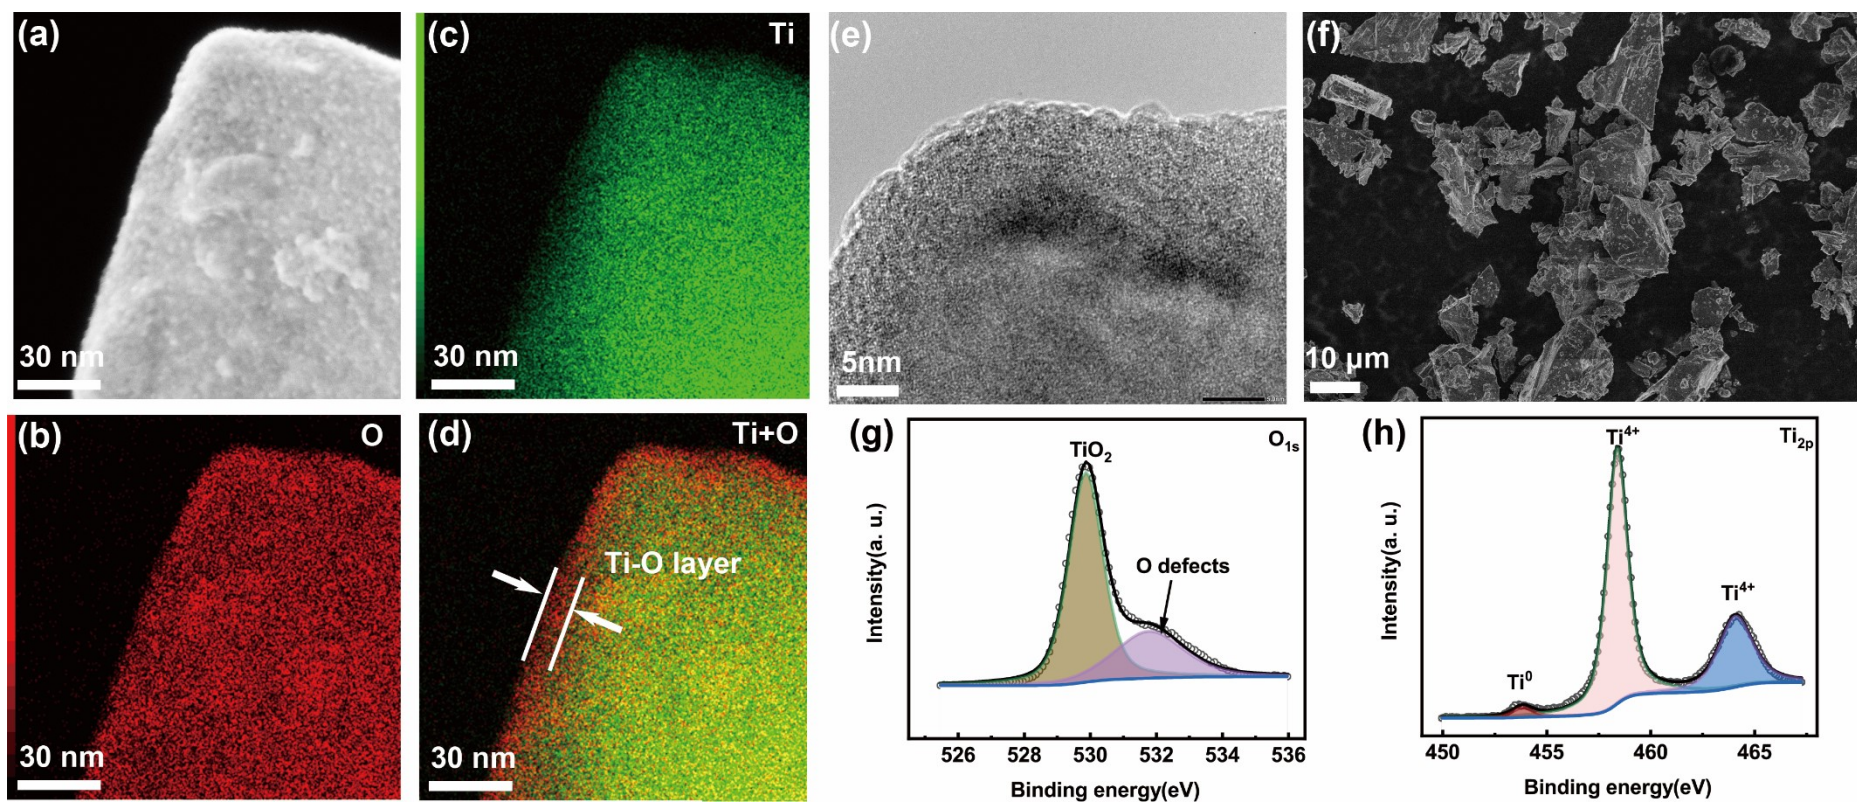

Figure S4 Microstructure and composition analysis of the commercial  $\text{TiH}_2$  powder. (a) TEM image and the corresponding (b) Ti mapping. (c) O mapping, (d) O and Ti overlapped mapping. (e) HTEM image of the edge of the  $\text{TiH}_2$  particles, (f) SEM image, (g) O 1s spectrum and (h) Ti 2p spectrum.

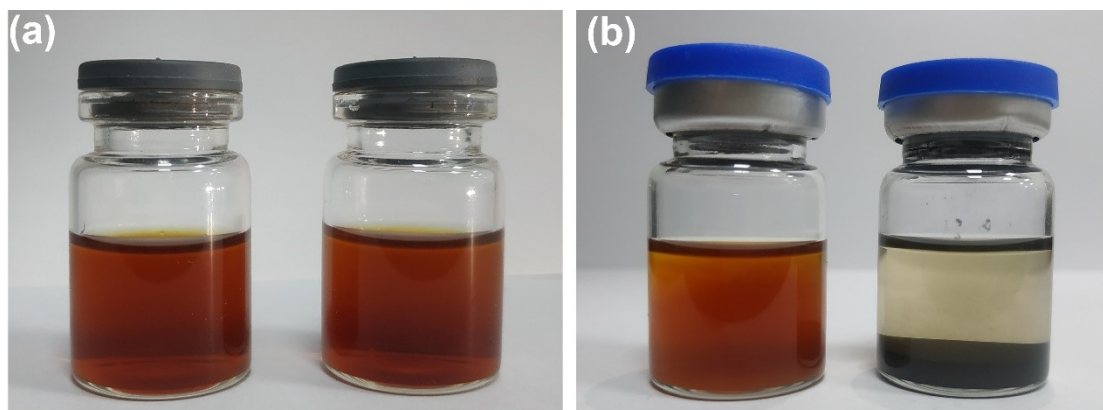

Figure S5 Photos of the polysulfide solution before (a) and (b) 10 min after the adding of the  $\text{TiH}_2$  powder. The left penicillin bottle is the control sample.

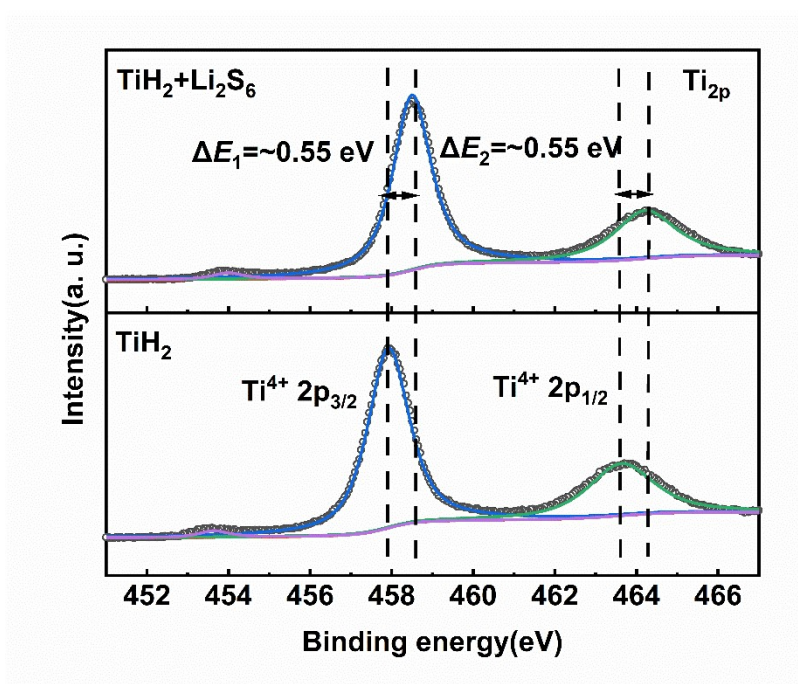

Figure S6 Ti 2p spectra of  $\text{TiH}_2$  before and after soaked in  $\text{Li}_2\text{S}_6$  solution

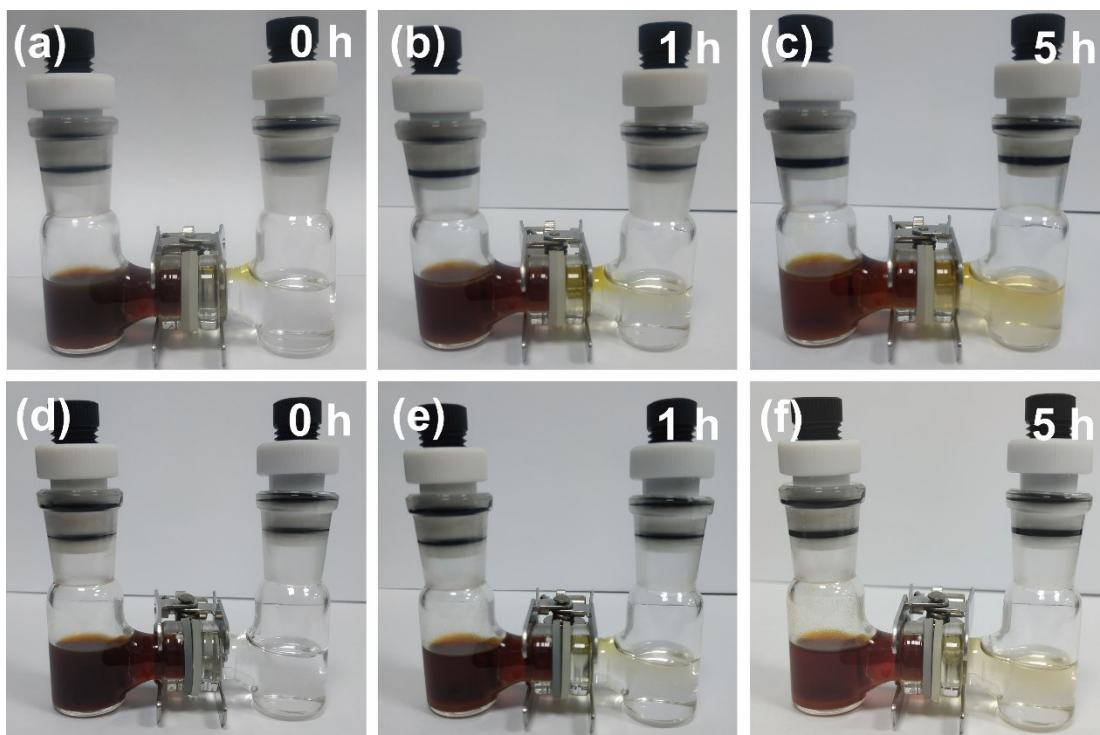

Figure S7 Visualized diffusion test of Celgard separator (a, b, c) and the  $\text{TiH}_2$  separator (d, e, f).

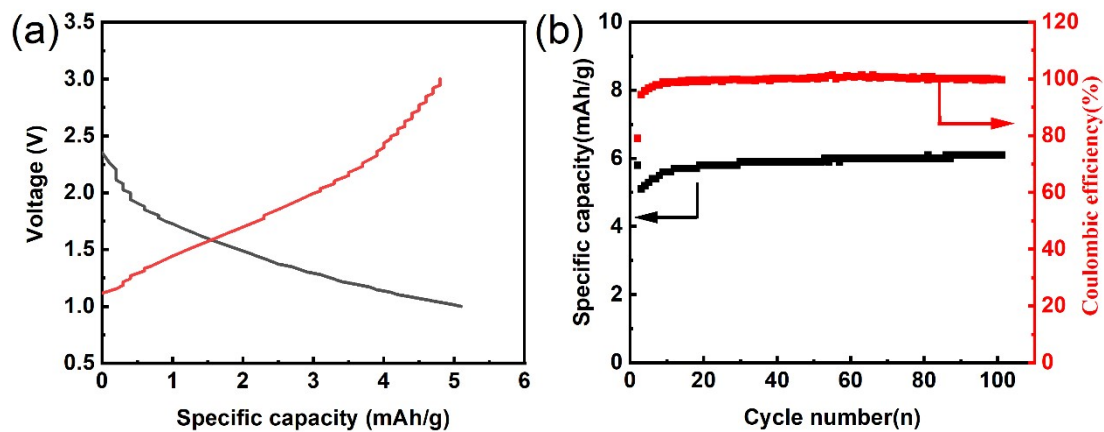

Figure S8 Electrochemical properties of milled  $\text{TiH}_2$  powder in Ar. (a) Discharge/charge profiles. (b) Cycling performance and Coulombic efficiency

Table S2 Ionic conductivities and total resistances of the  $\text{TiH}_2$  separator and Celgard separator

| separator                | ionic conductivity (mS/cm) | Total resistance ( $\Omega$ ) |
|--------------------------|----------------------------|-------------------------------|
| $\text{TiH}_2$ separator | 0.74                       | 3.65                          |
| Celgard separator        | 0.65                       | 1.98                          |



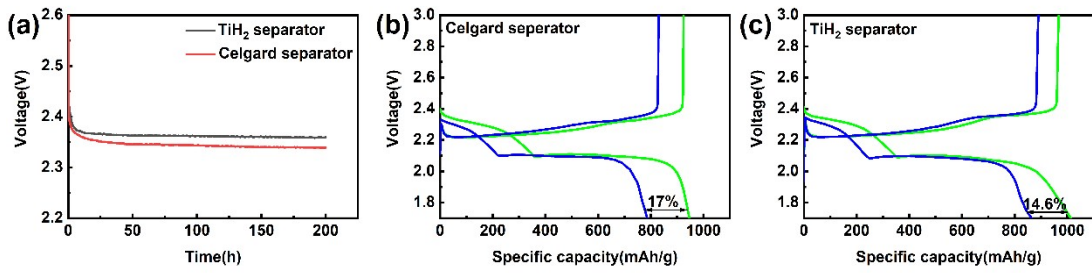

Figure S9 Self-discharge performances of the lithium sulfur batteries with different separators. (a) Open circuit voltage. Discharge/charge capacity loss of the lithium sulfur battery with the Celgard separator(b) and TiH<sub>2</sub> separator(c) after 200h.

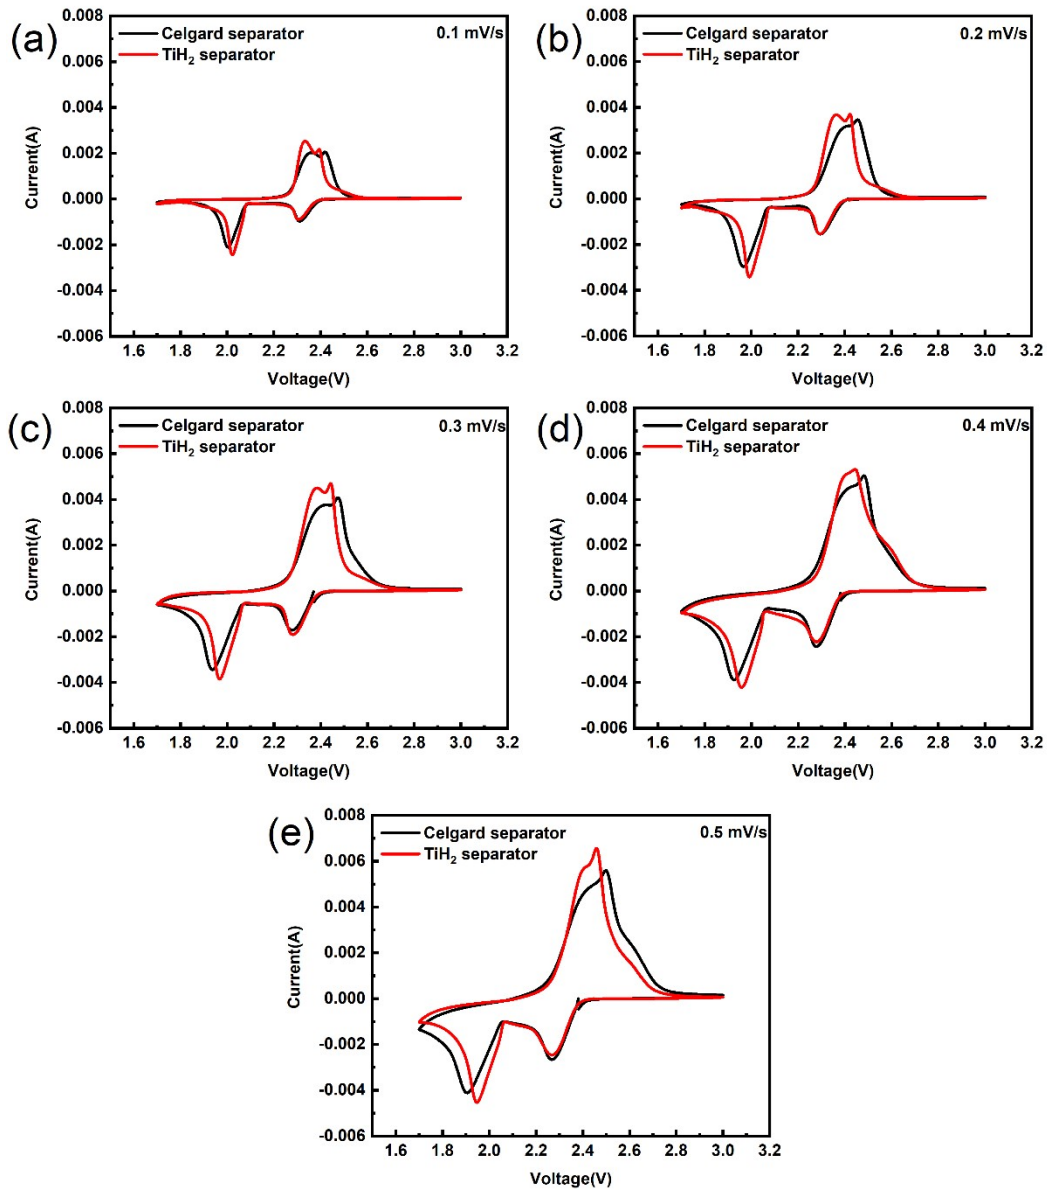

Figure S10 Cyclic voltammogram comparison of the lithium sulfur batteries with the Celgard separator and the TiH<sub>2</sub> separator. (a) 0.1 mV/s. (b) 0.2 mV/s. (c) 0.3 mV/s. (d) 0.4 mV/s. (e) 0.5 mV/s.

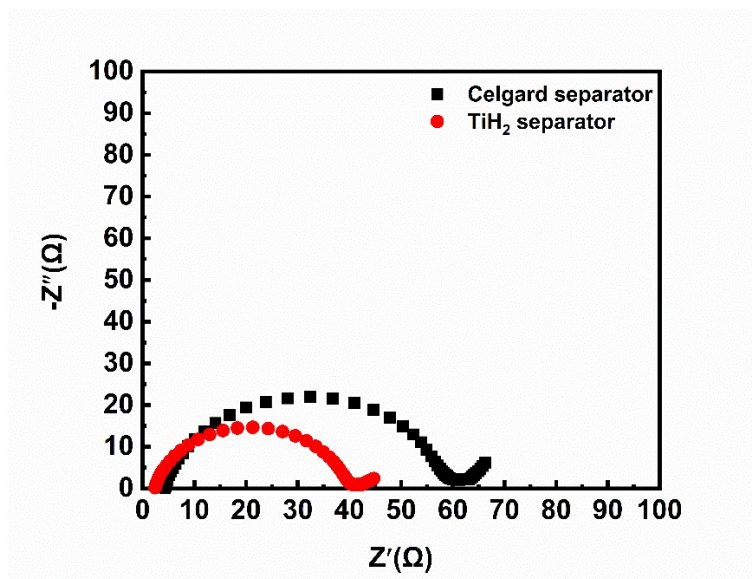

Figure S11 EIS of the lithium sulfur batteries with the Celgard separator and  $TiH_2$  separator
